# Supplementary material
Source: publisher figshare collection journal article supplement (https://gsajournals.figshare.com/articles/dataset/_/28396100)
Supplement: Supplementary file 1 [file 1]

## Sheet: Table S1
Table S1: Libraries
Set	Species	Genotype	Tissue	Replicates	Resource
Focal Species	Drosophila melanogaster	Maine Pool (12-13 lines)	Accessory Gland	3	PRJNA890638
Focal Species	Drosophila melanogaster	Panama Pool (12-13 lines)	Accessory Gland	3	PRJNA890638
Focal Species	Drosophila melanogaster	Z126	Accessory Gland	3	PRJNA890638
Focal Species	Drosophila melanogaster	Z126	Accessory Gland	3	PRJNA890638
Focal Species	Drosophila melanogaster	Z126	Accessory Gland	3	PRJNA890638
Focal Species	Drosophila melanogaster	Z126	Accessory Gland	3	PRJNA890638
Focal Species	Drosophila melanogaster	Z126	Accessory Gland	3	PRJNA890638
Focal Species	Drosophila melanogaster	Z126	Accessory Gland	3	PRJNA890638
Focal Species	Drosophila melanogaster	Maine Pool (12-13 lines)	Testis	3	PRJNA890638
Focal Species	Drosophila melanogaster	Panama Pool (12-13 lines)	Testis	3	PRJNA890638
Focal Species	Drosophila melanogaster	Z126	Testis	3	PRJNA890638
Focal Species	Drosophila melanogaster	Z126	Testis	3	PRJNA890638
Focal Species	Drosophila melanogaster	Z126	Testis	3	PRJNA890638
Focal Species	Drosophila melanogaster	Z126	Testis	3	PRJNA890638
Focal Species	Drosophila melanogaster	Z126	Testis	3	PRJNA890638
Focal Species	Drosophila melanogaster	Z126	Testis	3	PRJNA890638
Outgroup	Drosophila ananassae	136	Accessory Gland	1	Thompson et al. 2024
Outgroup	Drosophila ananassae	14024-0371.13	Accessory Gland	2	Thompson et al. 2024
Outgroup	Drosophila ananassae	TBU	Testis	1	Thompson et al. 2024
Outgroup	Drosophila ananassae	14024-0371.13	Testis	1	Thompson et al. 2024
Outgroup	Drosophila ananassae	TBU	Testis	2	Thompson et al. 2024
Outgroup	Drosophila simulans	Fair 7	1st Instar	1	PRJNA575046
Outgroup	Drosophila simulans	Lara 10	1st Instar	1	PRJNA575046
Outgroup	Drosophila simulans	w501	Accessory Gland	2	Thompson et al. 2024
Outgroup	Drosophila simulans	M116	Accessory Gland	3	Thompson et al. 2024
Outgroup	Drosophila simulans	M116	Accessory Gland	2	Thompson et al. 2024
Outgroup	Drosophila simulans	Lara 10	Accessory Gland	1	PRJNA575046
Outgroup	Drosophila simulans	Maine Pool (12-13 lines)	Accessory Gland	3	PRJNA1171453
Outgroup	Drosophila simulans	Panama Pool (12-13 lines)	Accessory Gland	3	PRJNA1171453
Outgroup	Drosophila simulans	w501	Accessory Gland	3	PRJNA913156
Outgroup	Drosophila simulans	Fair 7	Head	1	PRJNA575046
Outgroup	Drosophila simulans	Lara 10	Head	1	PRJNA575046
Outgroup	Drosophila simulans	Fair 7	Salivary Gland	1	PRJNA575046
Outgroup	Drosophila simulans	Lara 10	Salivary Gland	1	PRJNA575046
Outgroup	Drosophila simulans	Fair 7	Testis	1	PRJNA575046
Outgroup	Drosophila simulans	M116	Testis	2	Thompson et al. 2024
Outgroup	Drosophila simulans	w501	Testis	3	Thompson et al. 2024
Outgroup	Drosophila simulans	Lara 10	Testis	1	PRJNA575046
Outgroup	Drosophila simulans	Maine Pool (12-13 lines)	Testis	3	PRJNA1171453
Outgroup	Drosophila simulans	Panama Pool (12-13 lines)	Testis	3	PRJNA1171453
Outgroup	Drosophila simulans	w501	Testis	1	PRJNA575046
Outgroup	Drosophila simulans	wXD1	Testis	6	SRR7410596,SRR7410597,SRR9025055,SRR9025060
Outgroup	Drosophla yakuba	CY28	1st Instar	1	PRJNA575046
Outgroup	Drosophla yakuba	Tai18	1st Instar	1	PRJNA575046
Outgroup	Drosophla yakuba	CY28	Accessory Gland	1	PRJNA575046
Outgroup	Drosophla yakuba	CY28	Accessory Gland	2	Thompson et al. 2024
Outgroup	Drosophla yakuba	Tai18E2	Accessory Gland	2	Thompson et al. 2024
Outgroup	Drosophla yakuba	Tai18	Accessory Gland	1	PRJNA575046
Outgroup	Drosophla yakuba	CY28	Head	1	PRJNA575046
Outgroup	Drosophla yakuba	Tai18	Head	1	PRJNA575046
Outgroup	Drosophla yakuba	CY28	Salivary Gland	1	PRJNA575046
Outgroup	Drosophla yakuba	Tai18	Salivary Gland	1	PRJNA575046
Outgroup	Drosophla yakuba	CY28	Testis	1	PRJNA575046
Outgroup	Drosophla yakuba	CY28	Testis	2	Thompson et al. 2024
Outgroup	Drosophla yakuba	Tai18E2	Testis	2	Thompson et al. 2024
Outgroup	Drosophla yakuba	CY28	Testis	2	PRJNA575046
Outgroup	Drosophla yakuba	Tai18	Testis	1	PRJNA575046

## Sheet: Table S2
Table S2: Candidates Dropped Due to Splice Site Matches
Match	DenovoID	GeneID	Chromosome	Denovo Start	Denovo Stop	FBgn Junction Position
JunctionMatch	denovo_1119	FBgn0011224	3R	31862976	31863735	31857971
JunctionMatch	denovo_661	FBgn0058470	3L	23953282	23953802	23935121
JunctionMatch	denovo_556	FBgn0085397	2R	21887506	21890469	21883589
JunctionMatch	denovo_1060	FBgn0003175	2R	22557866	22558039	22556794
JunctionMatch	denovo_882	FBgn0283451	X	1586228	1586861	1575721
MidExon	denovo_1041	FBgn0029701	X	4264678	4265039	4266107
JunctionMatch	denovo_1173	FBgn0034286	2R	17980214	17981710	17979540
JunctionMatch	denovo_1195	FBgn0035755	3L	7259068	7259336	7252296
MidExon	denovo_205	FBgn0266952	3L	10235304	10236004	10240312
JunctionMatch	denovo_841	FBgn0003255	2L	14011580	14012315	13993830
JunctionMatch	denovo_1128	FBgn0261706	2R	23018360	23018644	22985726
JunctionMatch	denovo_871	FBgn0028509	2L	13876319	13876796	13836432
JunctionMatch	denovo_104	FBgn0261833	3R	26353814	26354348	26325293
JunctionMatch	denovo_719	FBgn0261502	3R	7392821	7393368	7391963
JunctionMatch	denovo_929	FBgn0052423	3L	5224371	5226655	5219285
JunctionMatch	denovo_1020	FBgn0000114	2L	12227836	12228189	12206130
JunctionMatch	denovo_1211	FBgn0003984	3L	5824647	5825621	5818286
JunctionMatch	denovo_1118	FBgn0005775	3L	4957395	4958043	4956883
MidExon	denovo_586	FBgn0265882	3L	18452673	18454011	18457214
MidExon	denovo_1193	FBgn0050429	2R	25232767	25233926	25246504
JunctionMatch	denovo_306	FBgn0036202	3L	11761304	11761980	11760110
MidExon	denovo_660	FBgn0265166	3R	12890826	12891299	12892070
JunctionMatch	denovo_73	FBgn0085443	X	10579517	10580339	10578606
MidExon	denovo_775	FBgn0021800	2L	3824526	3825158	3808524
MidExon	denovo_367	FBgn0260003	3R	19499396	19522247	19494318
MidExon	denovo_203	FBgn0037827	3R	10712811	10713500	10714880
JunctionMatch	denovo_1343	FBgn0261260	X	9500809	9501829	9473266
JunctionMatch	denovo_1112	FBgn0036934	3L	20065960	20066595	20060721
JunctionMatch	denovo_589	FBgn0000416	3R	30891612	30893496	30888739
JunctionMatch	denovo_850	FBgn0024754	2R	15645304	15655609	15568826
JunctionMatch	denovo_938	FBgn0011224	3R	31887147	31887695	31881871
JunctionMatch	denovo_644	FBgn0027539	3R	24811204	24811908	24809486
MidExon	denovo_353	FBgn0267268	2L	21947911	21948259	21950253
JunctionMatch	denovo_1037	FBgn0037130	3L	21774190	21774677	21761265
JunctionMatch	denovo_1018	FBgn0010415	2R	21401939	21404322	21399313
JunctionMatch	denovo_416	FBgn0266751	3R	22189269	22193123	22195011
JunctionMatch	denovo_1311	FBgn0000036	3R	24437407	24437709	24421904
JunctionMatch	denovo_615	FBgn0039932	4	967548	968077	965639
JunctionMatch	denovo_748	FBgn0259958	2L	4425851	4431268	4441753
JunctionMatch	denovo_176	FBgn0037956	3R	11854675	11855537	11838230
JunctionMatch	denovo_910	FBgn0000114	2L	12224842	12225503	12206130
JunctionMatch	denovo_1202	FBgn0002930	2R	7167547	7168861	7158065
JunctionMatch	denovo_838	FBgn0025525	3L	1175566	1176169	1174607
JunctionMatch	denovo_803	FBgn0000547	2L	4025134	4036877	4074521
JunctionMatch	denovo_142	FBgn0266098	X	5095764	5105241	5090145
MidExon	denovo_119	FBgn0013810	2L	17493025	17493806	17501456
JunctionMatch	denovo_159	FBgn0005775	3L	5054043	5060003	5045425
JunctionMatch	denovo_720	FBgn0040063	2R	23257599	23259128	23244885
JunctionMatch	denovo_899	FBgn0262869	3R	20479198	20480077	20465110
JunctionMatch	denovo_952	FBgn0261262	3R	18938302	18939217	18937640
JunctionMatch	denovo_1058	FBgn0051481	3R	6724109	6730235	6711950
MidExon	denovo_1232	FBgn0266416	3R	11552533	11553130	11535773
JunctionMatch	denovo_228	FBgn0052683	X	10435958	10437495	10427517
JunctionMatch	denovo_1222	FBgn0036449	3L	14781819	14782346	14779022
MidExon	denovo_1203	FBgn0039425	3R	26368884	26370689	26414108
JunctionMatch	denovo_799	FBgn0267293	2L	17238615	17245377	17280334
JunctionMatch	denovo_930	FBgn0031835	2L	6583840	6585775	6580510
JunctionMatch	denovo_503	FBgn0039049	3R	23078078	23080255	23091861
JunctionMatch	denovo_1304	FBgn0010415	2R	21426849	21428326	21412418
JunctionMatch	denovo_1002	FBgn0036529	3L	15709538	15710034	15685529
JunctionMatch	denovo_668	FBgn0264443	2L	20012317	20018109	19999373
MidExon	denovo_444	FBgn0038065	3R	12540659	12542177	12628157
JunctionMatch	denovo_339	FBgn0004573	3R	31001054	31001681	30977520
JunctionMatch	denovo_653	FBgn0031195	X	22522310	22526505	22515593
JunctionMatch	denovo_700	FBgn0034624	2R	21353941	21354261	21349821
JunctionMatch	denovo_1293	FBgn0036518	3L	15616022	15618227	15601295
JunctionMatch	denovo_145	FBgn0041150	2L	4917642	4924948	4912778
MidExon	denovo_255	FBgn0035541	3L	4408966	4409445	4405962
JunctionMatch	denovo_414	FBgn0036789	3L	18490691	18495675	18488954
JunctionMatch	denovo_154	FBgn0033636	2R	11593773	11594197	11592175
MidExon	denovo_1120	FBgn0034671	2R	21955679	21956908	21954781
JunctionMatch	denovo_108	FBgn0051663	2L	1890641	1891162	1876591
JunctionMatch	denovo_336	FBgn0022382	2R	10015218	10015540	10005377
MidExon	denovo_1336	FBgn0267749	3R	28158753	28159787	28153592
JunctionMatch	denovo_445	FBgn0033438	2R	9633555	9634603	9615503
JunctionMatch	denovo_271	FBgn0023407	2L	13539619	13540174	13535026
JunctionMatch	denovo_1059	FBgn0283477	3R	16316345	16317406	16339309

## Sheet: Table S3
Table S3: Expression Means and Number of Zambian Lines Expressed in Outgroup Filtered vs Retained Candidates
Tissue	Group	Type	Count	Mean (of Median)	p-value	Mean # Expressed Lines	p-value
AG	Main Table	Intergenic	37	3.5	0.271	2.4	0.0625
AG	Outgroup	Intergenic	13	6.4		4
AG	Main Table	Intronic	24	2.6	0.327	2.5	0.88
AG	Outgroup	Intronic	10	2.1		2.4
Testis	Main Table	Intergenic	243	3	0.637	1.9	0.000685
Testis	Outgroup	Intergenic	111	3.3		2.5
Testis	Main Table	Intronic	178	2.7	0.795	2	0.555
Testis	Outgroup	Intronic	109	2.6		2.1

## Sheet: Table S4
Table S4: Candidate de novo Genes
Tissue	GeneID	Ch	Start	Stop	Type	Maximum Transcript Length	Number of Transcripts	MaxEx	Zambiam Median TPM	Zambian Candidates TMP ≥ 1	Maine Median TPM	Maine Candidates TMP ≥ 1	Panama Median TPM	Panama Candidates TMP ≥ 1	Zambia vs. Maine LFC	Zambia vs.Panama LFC	Maine vs.Panama LFC
AG	denovo_983	2L	435083	435725	Intronic	642	1	1	1.427	1	NA	0	NA	0	NA	NA	NA
testis	denovo_1051	2L	612939	613708	Intergenic	775	1	1	2.127	1	NA	0	NA	0	NA	NA	NA
testis	denovo_7	2L	805993	807900	Intergenic	1838	8	2	15.522	1	1.379	1	NA	0	-1.20898	-1.99076	NA
testis	denovo_56	2L	885650	886935	Intergenic	1287	1	1	4.117	2	NA	0	NA	0	-2.66369	NA	NA
testis	denovo_1295	2L	991990	994325	Intergenic	2344	5	2	8.008	2	NA	0	NA	0	-4.32366	-7.56159	NA
testis	denovo_302	2L	995521	996114	Intergenic	510	1	2	1.544	1	NA	0	NA	0	NA	NA	NA
testis	denovo_9	2L	1401948	1402564	Intronic	617	1	1	4.504	4	1.654	1	3.127	1	-1.82136	NA	NA
testis	denovo_1030	2L	1488221	1488715	Intergenic	502	3	2	3.096	1	1.316	1	NA	0	NA	NA	NA
testis	denovo_109	2L	1535166	1536234	Intergenic	352	2	2	2.026	1	NA	0	NA	0	NA	NA	NA
testis	denovo_172	2L	1559249	1559968	Intronic	720	1	1	NA	0	NA	0	1.246	1	NA	NA	NA
testis	denovo_903	2L	1672121	1672862	Intronic	633	3	2	1.717	2	NA	0	NA	0	NA	NA	NA
testis	denovo_677	2L	1786427	1786906	Intergenic	482	1	1	1.634	2	NA	0	NA	0	NA	NA	NA
testis	denovo_555	2L	2086479	2087373	Intronic	897	3	1	1.321	3	NA	0	NA	0	NA	NA	NA
testis	denovo_655	2L	2090429	2091099	Intronic	630	1	2	2.129	1	NA	0	NA	0	NA	NA	NA
testis	denovo_993	2L	2333765	2334469	Intronic	697	1	1	1.422	1	NA	0	NA	0	NA	NA	NA
testis	denovo_380	2L	2484406	2487006	Intergenic	1642	1	2	1.059	1	NA	0	1.221	1	NA	NA	NA
testis	denovo_620	2L	2523750	2528358	Intergenic	1604	12	3	1.173	1	NA	0	NA	0	NA	NA	NA
testis	denovo_755	2L	2685937	2686244	Intronic	308	1	1	1.065	1	NA	0	NA	0	NA	NA	NA
testis	denovo_141	2L	2801722	2802828	Intergenic	1079	1	1	1.114	1	NA	0	NA	0	NA	NA	NA
testis	denovo_144	2L	3114904	3115997	Intronic	1126	3	1	4.608	4	NA	0	1.451	1	-3.72891	NA	NA
testis	denovo_1017	2L	3222406	3223594	Intergenic	1190	1	1	1.845	3	NA	0	NA	0	NA	NA	NA
testis	denovo_1320	2L	3225865	3227717	Intergenic	1842	5	2	1.038	1	NA	0	NA	0	NA	NA	NA
testis	denovo_266	2L	3241046	3241667	Intergenic	611	1	1	3.31	3	NA	0	NA	0	-5.69972	-4.86229	NA
testis	denovo_698	2L	3427562	3427912	Intergenic	359	1	1	1.388	1	NA	0	NA	0	NA	NA	NA
testis	denovo_614	2L	3673872	3674281	Intronic	401	1	1	1.463	1	1.316	1	2.684	1	NA	2.47243	NA
testis	denovo_794	2L	3840909	3842089	Intergenic	1183	2	1	1.362	3	NA	0	NA	0	NA	NA	NA
testis	denovo_966	2L	4126906	4128036	Intergenic	1114	6	2	4.728	4	NA	0	1.22	1	-4.28386	NA	NA
testis	denovo_1027	2L	4358212	4358824	Intergenic	614	2	1	3.78	3	NA	0	NA	0	-5.40108	-5.33368	NA
testis	denovo_1144	2L	4672162	4674138	Intergenic	1983	3	2	2.438	1	NA	0	NA	0	NA	NA	NA
testis	denovo_282	2L	5023130	5023424	Intronic	302	2	1	2.735	4	NA	0	NA	0	-4.45129	-4.91817	NA
testis	denovo_1172	2L	5024128	5024440	Intronic	313	1	1	1.2	2	NA	0	NA	0	NA	NA	NA
testis	denovo_1042	2L	5084860	5085839	Intronic	876	8	2	1.882	2	NA	0	NA	0	NA	NA	NA
testis	denovo_650	2L	5367704	5368073	Intergenic	370	1	1	NA	0	NA	0	1.147	1	NA	NA	NA
testis	denovo_103	2L	5494933	5496932	Intergenic	878	3	3	1.496	1	NA	0	NA	0	NA	NA	NA
testis	denovo_914	2L	5649190	5649807	Intronic	617	1	1	NA	0	NA	0	1.125	1	NA	3.20505	NA
AG	denovo_744	2L	5872909	5873601	Intronic	693	5	2	1.591	3	NA	0	NA	0	NA	NA	NA
testis	denovo_1110	2L	6247494	6247900	Intergenic	416	1	1	1.425	1	NA	0	NA	0	NA	NA	NA
testis	denovo_1186	2L	6248493	6249543	Intergenic	988	3	3	2.389	1	NA	0	NA	0	NA	NA	NA
testis	denovo_1100	2L	6298822	6299933	Intronic	1042	6	2	18.058	4	NA	0	1.218	1	-3.47296	-2.76518	NA
testis	denovo_1140	2L	6311054	6311712	Intronic	668	6	2	1.432	3	NA	0	NA	0	NA	NA	NA
testis	denovo_1149	2L	6825699	6829191	Intronic	800	2	2	1.483	1	NA	0	NA	0	NA	NA	NA
testis	denovo_1247	2L	6883074	6883600	Intronic	522	1	1	2.009	1	NA	0	NA	0	NA	NA	NA
testis	denovo_969	2L	7294947	7296056	Intergenic	1200	2	1	13.928	1	NA	0	NA	0	-6.597	-6.53088	NA
testis	denovo_958	2L	7669021	7670342	Intronic	483	1	2	1.282	1	NA	0	NA	0	NA	NA	NA
testis	denovo_965	2L	7676425	7677502	Intronic	810	3	2	6.553	1	NA	0	NA	0	-4.12863	-3.65521	NA
testis	denovo_766	2L	8473464	8475403	Intronic	1831	2	3	1.661	1	NA	0	NA	0	NA	NA	NA
testis	denovo_204	2L	8552094	8553482	Intronic	1390	8	2	2.744	1	NA	0	NA	0	NA	NA	NA
testis	denovo_1220	2L	8612055	8613159	Intronic	601	4	2	2.013	3	1.18	1	2.292	1	NA	NA	NA
testis	denovo_996	2L	8613730	8615132	Intronic	654	7	2	9.393	2	1.483	1	NA	0	-1.93805	-3.57808	NA
testis	denovo_942	2L	8623631	8624040	Intronic	340	2	2	5.66	3	NA	0	NA	0	-2.70978	-4.30608	NA
testis	denovo_991	2L	8819137	8820438	Intergenic	1198	1	2	1.118	1	NA	0	NA	0	NA	NA	NA
testis	denovo_855	2L	9043791	9044955	Intergenic	1077	2	2	1.776	3	NA	0	NA	0	NA	NA	NA
testis	denovo_178	2L	9150663	9151183	Intronic	471	1	2	4.142	2	NA	0	NA	0	-3.09424	NA	NA
testis	denovo_1073	2L	9316451	9317598	Intergenic	1148	6	3	1.685	1	1.445	1	NA	0	NA	NA	NA
testis	denovo_393	2L	9657956	9658920	Intergenic	976	1	1	3.376	5	NA	0	NA	0	-6.97288	-3.78443	NA
testis	denovo_1280	2L	9873908	9875871	Intronic	1991	2	2	2.393	1	NA	0	NA	0	NA	NA	NA
testis	denovo_731	2L	10043340	10044570	Intergenic	1242	2	2	NA	0	1.937	1	NA	0	6.65453	NA	NA
testis	denovo_31	2L	10523172	10523914	Intergenic	741	3	2	11.777	1	NA	0	NA	0	-5.97814	-5.38521	NA
testis	denovo_1085	2L	10714600	10715915	Intergenic	1245	2	2	2.336	1	NA	0	NA	0	NA	NA	NA
testis	denovo_1108	2L	11296167	11296677	Intergenic	522	7	2	3.731	5	NA	0	NA	0	-3.87373	NA	NA
testis	denovo_453	2L	11570248	11571381	Intergenic	1147	2	1	5.6	2	NA	0	NA	0	-5.66564	-5.84644	NA
testis	denovo_52	2L	11688222	11688965	Intergenic	746	1	1	1.234	1	NA	0	NA	0	NA	NA	NA
testis	denovo_825	2L	11709575	11710175	Intergenic	602	1	1	5.945	5	1.794	1	1.812	1	-2.08993	NA	NA
testis	denovo_1245	2L	12203926	12204343	Intronic	522	1	1	NA	0	2.22	1	NA	0	5.65017	NA	NA
testis	denovo_674	2L	12329066	12329788	Intergenic	726	1	1	1.721	1	NA	0	NA	0	NA	NA	NA
testis	denovo_3	2L	12871345	12872304	Intergenic	1022	3	2	3.781	1	NA	0	NA	0	NA	NA	NA
testis	denovo_769	2L	13114004	13114540	Intergenic	539	1	1	5.75	1	NA	0	NA	0	-5.05179	-4.05018	NA
testis	denovo_1153	2L	13428287	13429218	Intronic	948	1	1	1.586	2	NA	0	NA	0	NA	NA	NA
AG	denovo_664	2L	13584586	13586118	Intronic	1534	1	1	1.366	1	NA	0	NA	0	NA	NA	NA
testis	denovo_1087	2L	13598891	13600913	Intronic	1092	2	2	1.32	1	NA	0	NA	0	NA	NA	NA
testis	denovo_783	2L	14007247	14007586	Intergenic	335	1	1	1.23	1	NA	0	NA	0	NA	NA	NA
AG	denovo_82	2L	14310052	14310745	Intronic	685	1	1	4.366	1	NA	0	NA	0	NA	NA	NA
testis	denovo_1253	2L	14436155	14436635	Intergenic	481	1	1	2.135	2	NA	0	NA	0	-2.45952	NA	NA
testis	denovo_541	2L	14536246	14537675	Intergenic	1229	3	2	27.424	1	5.908	1	4.709	1	NA	NA	NA
testis	denovo_160	2L	14709212	14709938	Intergenic	659	1	2	1.302	1	NA	0	NA	0	NA	NA	NA
testis	denovo_235	2L	15480496	15481800	Intergenic	1302	3	3	2	2	NA	0	NA	0	NA	NA	NA
testis	denovo_885	2L	15511400	15512155	Intergenic	756	1	1	1.023	1	NA	0	NA	0	NA	NA	NA
testis	denovo_288	2L	15557771	15559133	Intronic	1363	2	1	1.23	1	NA	0	NA	0	NA	NA	NA
testis	denovo_173	2L	15595835	15596504	Intergenic	692	1	1	6.351	4	NA	0	NA	0	-6.80105	-6.73465	NA
testis	denovo_345	2L	15604338	15605045	Intergenic	700	1	1	2.025	3	NA	0	NA	0	-1.45267	NA	NA
AG	denovo_567	2L	15818982	15819633	Intergenic	654	4	2	2.048	5	NA	0	NA	0	NA	NA	NA
testis	denovo_550	2L	16153286	16161335	Intergenic	1039	2	2	1.793	1	NA	0	NA	0	NA	NA	NA
testis	denovo_1105	2L	16217611	16224113	Intergenic	1211	4	4	1.569	1	NA	0	NA	0	NA	NA	NA
testis	denovo_1047	2L	16270641	16271249	Intronic	608	1	1	1.083	1	NA	0	NA	0	NA	NA	NA
testis	denovo_510	2L	16375043	16375504	Intergenic	521	2	2	1.291	1	NA	0	NA	0	NA	NA	NA
testis	denovo_285	2L	16396369	16397075	Intergenic	702	1	1	1.333	2	NA	0	NA	0	NA	NA	NA
testis	denovo_651	2L	16566072	16567020	Intronic	820	2	3	6.715	1	NA	0	NA	0	-4.41179	-4.75603	NA
testis	denovo_418	2L	16573567	16573994	Intronic	431	1	1	1.707	2	NA	0	NA	0	NA	NA	NA
testis	denovo_795	2L	16599049	16599685	Intronic	620	2	1	2.896	2	NA	0	NA	0	-4.71031	-4.64479	NA
testis	denovo_69	2L	16929345	16929681	Intergenic	337	1	1	3.812	4	NA	0	NA	0	NA	NA	NA
testis	denovo_1332	2L	17064203	17064768	Intergenic	569	1	1	3.427	1	NA	0	NA	0	NA	NA	NA
testis	denovo_1175	2L	17090381	17090944	Intergenic	570	1	1	1.479	3	NA	0	NA	0	NA	NA	NA
testis	denovo_157	2L	17092738	17093099	Intergenic	362	1	1	NA	0	8.616	1	1.089	1	NA	NA	NA
testis	denovo_376	2L	17156350	17157332	Intronic	930	2	3	5.503	3	NA	0	NA	0	-6.00012	-3.84361	NA
testis	denovo_784	2L	17549617	17550540	Intergenic	912	3	1	1.609	3	NA	0	NA	0	-3.44666	NA	NA
testis	denovo_242	2L	17568293	17569039	Intergenic	742	1	1	1.154	1	1.739	1	NA	0	NA	NA	NA
testis	denovo_601	2L	17763888	17764530	Intronic	645	2	1	3.965	4	NA	0	NA	0	-4.96866	-5.14829	NA
testis	denovo_986	2L	17828952	17830539	Intronic	1593	5	1	5.556	6	1.263	1	2.32	1	-2.03845	-1.77765	NA
testis	denovo_1214	2L	18000466	18001438	Intergenic	984	3	1	1.819	1	1.259	1	3.413	1	NA	NA	NA
testis	denovo_227	2L	18102895	18103293	Intergenic	678	2	2	NA	0	1.253	1	NA	0	NA	NA	NA
testis	denovo_1160	2L	18910914	18911808	Intergenic	863	2	1	2.432	3	NA	0	NA	0	NA	-3.61506	NA
testis	denovo_1318	2L	19462458	19463385	Intergenic	960	1	1	1.873	1	NA	0	NA	0	NA	NA	NA
testis	denovo_1227	2L	19675822	19677149	Intronic	1325	3	2	1.161	1	NA	0	NA	0	NA	NA	NA
AG	denovo_455	2L	19871756	19872544	Intronic	765	2	1	2.266	5	NA	0	NA	0	-2.22799	-1.41342	NA
AG	denovo_1115	2L	19877124	19877424	Intronic	301	1	1	1.021	1	NA	0	NA	0	NA	NA	NA
AG	denovo_293	2L	20020243	20020647	Intergenic	406	1	1	1.123	1	NA	0	NA	0	NA	NA	NA
testis	denovo_666	2L	20267340	20268195	Intergenic	856	1	1	3.917	1	NA	0	NA	0	NA	NA	NA
testis	denovo_904	2L	20270071	20271089	Intergenic	989	2	3	1.132	1	NA	0	NA	0	NA	NA	NA
testis	denovo_384	2L	21811755	21812277	Intergenic	527	1	1	1.736	1	NA	0	NA	0	NA	NA	NA
AG	denovo_798	2L	21936979	21937398	Intergenic	420	1	1	3.366	1	NA	0	NA	0	NA	NA	NA
testis	denovo_1313	2L	22100391	22100723	Intergenic	334	1	1	4.228	1	NA	0	NA	0	NA	NA	NA
testis	denovo_245	2L	22557631	22558243	Intergenic	614	2	1	1.509	2	NA	0	NA	0	NA	NA	NA
testis	denovo_604	2R	3554635	3554952	Intergenic	318	1	1	1.439	1	NA	0	1.412	1	NA	NA	NA
AG	denovo_1349	2R	5173105	5173768	Intergenic	663	1	1	1.432	3	NA	0	NA	0	-4.16091	-3.27161	NA
testis	denovo_1001	2R	5515436	5515902	Intronic	471	3	1	2.246	1	NA	0	NA	0	NA	NA	NA
testis	denovo_545	2R	5984949	5985749	Intronic	810	1	1	1.928	2	NA	0	NA	0	NA	NA	NA
testis	denovo_571	2R	6105518	6106538	Intronic	1022	1	1	1.256	1	NA	0	NA	0	NA	NA	NA
testis	denovo_180	2R	7416408	7417052	Intergenic	543	1	2	1.162	1	NA	0	NA	0	NA	NA	NA
testis	denovo_296	2R	8200811	8201197	Intronic	396	1	1	4.39	5	1.009	1	NA	0	-2.19712	-3.54314	NA
testis	denovo_922	2R	8296445	8296862	Intergenic	418	1	1	NA	0	1.083	1	NA	0	NA	NA	NA
testis	denovo_1158	2R	8312632	8313619	Intergenic	988	1	1	2.483	2	NA	0	NA	0	NA	NA	NA
testis	denovo_110	2R	8548601	8549438	Intergenic	794	1	2	4.027	2	NA	0	NA	0	-5.81637	-4.51892	NA
testis	denovo_630	2R	8817294	8818263	Intronic	969	1	1	1.3	2	NA	0	NA	0	NA	NA	NA
AG	denovo_835	2R	9038612	9039005	Intergenic	394	1	1	1.056	1	NA	0	NA	0	NA	NA	NA
AG	denovo_1352	2R	9492065	9492551	Intergenic	504	2	2	1.35	1	NA	0	NA	0	NA	NA	NA
testis	denovo_613	2R	9662010	9662618	Intronic	611	2	1	2.156	1	NA	0	NA	0	NA	NA	NA
AG	denovo_561	2R	10682375	10682587	Intronic	375	1	2	1.347	1	NA	0	NA	0	NA	NA	NA
AG	denovo_315	2R	10685287	10685571	Intronic	319	1	1	2.855	4	NA	0	NA	0	-5.18199	-4.75913	NA
testis	denovo_532	2R	10936635	10937627	Intergenic	848	1	3	1.219	2	NA	0	NA	0	NA	NA	NA
AG	denovo_1323	2R	10965003	10965802	Intergenic	799	1	1	1.879	1	NA	0	NA	0	NA	NA	NA
testis	denovo_267	2R	11180681	11181061	Intronic	423	1	2	4.834	1	NA	0	NA	0	NA	NA	NA
AG	denovo_665	2R	11263498	11263808	Intergenic	316	2	1	1.052	1	NA	0	NA	0	NA	NA	NA
testis	denovo_537	2R	11545054	11545956	Intergenic	903	1	1	1.248	1	NA	0	NA	0	NA	NA	NA
testis	denovo_247	2R	11815720	11816451	Intergenic	732	1	1	NA	0	1.059	1	NA	0	2.23831	NA	NA
testis	denovo_1294	2R	11956942	11957272	Intronic	331	2	1	1.078	1	NA	0	NA	0	NA	NA	NA
testis	denovo_786	2R	12219195	12219613	Intergenic	419	1	1	1.252	1	NA	0	NA	0	NA	NA	NA
AG	denovo_1296	2R	12281383	12281683	Intronic	341	2	2	1.385	2	NA	0	NA	0	NA	NA	NA
testis	denovo_905	2R	13463583	13464815	Intronic	1154	4	3	4.713	4	NA	0	NA	0	-1.80137	-2.06188	NA
testis	denovo_581	2R	13684626	13685618	Intronic	979	7	2	4.72	6	1.504	1	2.732	1	-1.39624	NA	NA
testis	denovo_456	2R	13736475	13736864	Intronic	392	1	1	1.394	1	NA	0	NA	0	NA	NA	NA
testis	denovo_623	2R	14209107	14209412	Intronic	665	2	1	2.826	3	NA	0	NA	0	-4.53834	-4.47329	NA
testis	denovo_560	2R	14415172	14418099	Intergenic	949	6	2	NA	0	NA	0	1.206	1	NA	NA	NA
testis	denovo_790	2R	14541870	14543119	Intronic	1269	9	3	13.898	2	20.472	1	4.933	1	1.9876	NA	NA
testis	denovo_648	2R	14812163	14812860	Intergenic	699	2	1	NA	0	1.79	1	1.756	1	6.6189	6.83045	NA
testis	denovo_946	2R	15106921	15107239	Intergenic	319	1	1	1.321	1	NA	0	NA	0	NA	NA	NA
testis	denovo_1088	2R	15413996	15414598	Intronic	588	2	1	5.34	4	NA	0	NA	0	-4.31328	-4.2718	NA
testis	denovo_359	2R	15578497	15579774	Intergenic	1265	5	2	1.684	3	NA	0	1.126	1	-1.34038	NA	NA
testis	denovo_569	2R	15597782	15598177	Intergenic	388	1	1	3.137	1	NA	0	NA	0	NA	NA	NA
testis	denovo_317	2R	16375455	16376115	Intergenic	661	1	1	1.252	3	NA	0	NA	0	NA	NA	NA
AG	denovo_1035	2R	16966620	16967254	Intergenic	630	1	1	4.017	1	1.798	1	3.244	1	NA	1.95402	NA
testis	denovo_1126	2R	17229631	17231150	Intronic	1505	3	1	1.255	2	NA	0	NA	0	NA	NA	NA
testis	denovo_724	2R	17242404	17242974	Intronic	593	4	2	2.65	5	NA	0	NA	0	-3.64556	NA	NA
AG	denovo_701	2R	17260381	17260808	Intronic	410	1	1	2.79	5	NA	0	NA	0	-3.79608	-3.54383	NA
testis	denovo_519	2R	17635174	17635787	Intronic	614	2	1	1.698	1	NA	0	NA	0	NA	NA	NA
testis	denovo_238	2R	18265497	18266889	Intergenic	1388	2	1	2.564	2	NA	0	NA	0	-5.40139	-3.42734	NA
testis	denovo_412	2R	18267988	18268390	Intergenic	404	1	1	1.437	1	NA	0	NA	0	NA	NA	NA
testis	denovo_867	2R	18483963	18484604	Intronic	644	4	1	1.373	2	NA	0	1.624	1	NA	NA	NA
AG	denovo_97	2R	18530781	18531276	Intronic	496	1	1	1.551	3	NA	0	4.293	1	NA	1.81562	NA
testis	denovo_523	2R	18941262	18942033	Intronic	801	2	2	11.789	2	NA	0	NA	0	NA	NA	NA
testis	denovo_1097	2R	19264480	19265789	Intergenic	1145	1	2	NA	0	NA	0	1.702	1	NA	1.67992	NA
AG	denovo_230	2R	19514258	19514647	Intergenic	391	1	1	2.139	2	NA	0	NA	0	NA	-4.16173	NA
testis	denovo_1019	2R	19674671	19675428	Intergenic	760	1	1	8.573	1	NA	0	NA	0	-5.3942	-5.32776	NA
testis	denovo_22	2R	20203311	20205344	Intergenic	2046	4	1	1.37	3	NA	0	NA	0	NA	NA	NA
AG	denovo_920	2R	20759923	20761421	Intergenic	1421	9	4	3.99	1	NA	0	NA	0	NA	NA	NA
testis	denovo_743	2R	20845928	20846797	Intergenic	785	4	2	NA	0	1.279	1	NA	0	NA	NA	NA
testis	denovo_865	2R	20925161	20925806	Intronic	657	2	2	NA	0	NA	0	3.354	1	NA	NA	NA
testis	denovo_440	2R	20926775	20927447	Intronic	683	1	1	2.712	2	1.325	1	1.704	1	NA	NA	NA
testis	denovo_237	2R	21462298	21464436	Intronic	2095	2	2	2.123	2	NA	0	NA	0	NA	NA	NA
testis	denovo_265	2R	23196334	23198170	Intronic	1844	5	2	2.742	3	NA	0	NA	0	-2.73826	-4.2893	NA
testis	denovo_400	2R	23209058	23209417	Intergenic	361	1	1	1.205	1	NA	0	NA	0	NA	NA	NA
testis	denovo_1334	2R	23215252	23219301	Intergenic	3546	8	4	2.999	4	NA	0	NA	0	-2.81988	-2.76791	NA
AG	denovo_1338	2R	23618478	23619617	Intergenic	805	3	2	1.973	4	NA	0	NA	0	NA	NA	NA
testis	denovo_1285	2R	24437464	24438414	Intergenic	958	2	1	6.109	1	NA	0	NA	0	NA	NA	NA
testis	denovo_261	2R	24448538	24448855	Intergenic	318	1	1	4.066	2	NA	0	NA	0	-5.25624	-4.25653	NA
testis	denovo_513	2R	24457501	24458012	Intronic	512	1	1	1.57	2	NA	0	NA	0	NA	NA	NA
AG	denovo_407	2R	24546321	24546985	Intronic	667	1	1	2.85	3	NA	0	NA	0	NA	-2.25165	NA
testis	denovo_128	3L	42386	42949	Intergenic	499	1	2	1.619	2	NA	0	NA	0	NA	NA	NA
testis	denovo_730	3L	47537	48324	Intergenic	788	2	1	11.929	6	11.545	1	8.372	1	NA	NA	NA
testis	denovo_1305	3L	76462	77384	Intergenic	950	1	1	1.549	3	NA	0	NA	0	-4.7989	-3.80938	NA
testis	denovo_596	3L	612084	612806	Intergenic	723	1	1	2.263	2	3.39	1	NA	0	2.44566	NA	NA
testis	denovo_1142	3L	703193	703644	Intergenic	458	1	1	1.958	1	NA	0	NA	0	NA	NA	NA
testis	denovo_1239	3L	796151	797167	Intergenic	1017	2	2	1.254	1	NA	0	NA	0	NA	NA	NA
testis	denovo_1268	3L	807596	809055	Intergenic	1024	3	2	44.312	1	NA	0	NA	0	-8.171	-5.3647	NA
testis	denovo_361	3L	2207370	2207879	Intergenic	511	1	1	1.147	1	NA	0	NA	0	NA	NA	NA
testis	denovo_830	3L	2324619	2325363	Intronic	744	1	1	3.019	5	NA	0	NA	0	-6.25349	-6.18907	NA
testis	denovo_637	3L	2848466	2849076	Intronic	634	1	1	3.82	3	NA	0	1.438	1	-4.45233	NA	NA
testis	denovo_87	3L	3102512	3103084	Intronic	574	1	1	1.353	2	NA	0	NA	0	NA	NA	NA
testis	denovo_1143	3L	3503378	3504107	Intronic	725	1	1	1.59	1	NA	0	NA	0	NA	NA	NA
testis	denovo_592	3L	3672529	3674415	Intergenic	1911	6	3	1.489	3	NA	0	1.321	1	NA	NA	NA
testis	denovo_77	3L	3888107	3889110	Intergenic	1000	2	1	1.279	1	NA	0	NA	0	NA	NA	NA
AG	denovo_305	3L	4700221	4700896	Intronic	684	2	1	1.257	1	NA	0	1.583	1	NA	2.6668	NA
testis	denovo_780	3L	4724266	4725913	Intronic	1641	6	3	1.143	2	NA	0	NA	0	NA	NA	NA
testis	denovo_598	3L	4776043	4776334	Intronic	309	1	1	6.117	2	1.516	1	NA	0	NA	NA	NA
testis	denovo_1190	3L	4960999	4961802	Intronic	804	2	1	2.87	1	NA	0	NA	0	NA	NA	NA
testis	denovo_1206	3L	4990564	4991115	Intronic	553	1	1	1.186	1	NA	0	NA	0	NA	NA	NA
testis	denovo_494	3L	6013911	6014523	Intronic	612	1	1	1.676	1	NA	0	NA	0	NA	NA	NA
testis	denovo_74	3L	6316850	6317720	Intergenic	898	1	1	12.683	1	NA	0	NA	0	NA	NA	NA
testis	denovo_756	3L	6452388	6452896	Intronic	511	1	1	4.429	1	NA	0	NA	0	NA	NA	NA
testis	denovo_1189	3L	6498819	6499495	Intronic	678	1	1	1.263	1	NA	0	NA	0	NA	NA	NA
testis	denovo_123	3L	6500250	6502485	Intronic	1146	2	1	2.55	2	NA	0	NA	0	NA	NA	NA
testis	denovo_808	3L	6771989	6772485	Intergenic	522	1	1	2.476	2	NA	0	NA	0	NA	NA	NA
testis	denovo_1188	3L	6809534	6823805	Intergenic	1285	6	2	2.485	5	1.236	1	NA	0	-1.31504	-3.95383	NA
testis	denovo_649	3L	6826028	6826664	Intergenic	639	1	1	6.156	6	2.043	1	2.471	1	-1.82628	NA	NA
testis	denovo_92	3L	6828494	6829301	Intergenic	828	8	2	2.493	4	NA	0	NA	0	-3.56295	NA	NA
testis	denovo_805	3L	6869282	6870429	Intergenic	1145	2	1	NA	0	NA	0	1.503	1	NA	3.85022	NA
testis	denovo_487	3L	7008471	7009061	Intronic	466	8	2	1.151	2	NA	0	1.029	1	NA	NA	NA
testis	denovo_622	3L	7206642	7207453	Intergenic	812	1	1	1.838	1	NA	0	1.14	1	NA	NA	NA
testis	denovo_856	3L	7483244	7484307	Intergenic	1087	6	2	1.397	1	NA	0	NA	0	NA	NA	NA
testis	denovo_774	3L	7859465	7859824	Intronic	361	2	1	1.368	2	NA	0	NA	0	NA	NA	NA
testis	denovo_1235	3L	7941634	7942068	Intergenic	435	3	1	2.117	2	NA	0	NA	0	NA	NA	NA
testis	denovo_186	3L	8250122	8250916	Intronic	811	1	1	1.006	1	NA	0	NA	0	NA	NA	NA
testis	denovo_390	3L	9241213	9241707	Intergenic	495	1	1	NA	0	1.65	1	NA	0	7.07082	NA	NA
testis	denovo_436	3L	9313311	9313965	Intergenic	645	1	1	2.583	2	NA	0	NA	0	NA	NA	NA
testis	denovo_1237	3L	9327435	9327860	Intergenic	426	1	1	3.034	2	NA	0	NA	0	-3.52082	-4.22734	NA
testis	denovo_895	3L	9911435	9912132	Intronic	625	5	2	2.109	3	1.194	1	NA	0	NA	-2.85429	NA
testis	denovo_874	3L	10198772	10199569	Intronic	804	2	1	1.305	1	NA	0	8.506	1	NA	4.29604	NA
testis	denovo_939	3L	10230680	10231258	Intergenic	550	1	2	22.844	3	NA	0	NA	0	-8.78056	-8.18818	NA
testis	denovo_1276	3L	10400844	10401690	Intergenic	858	2	1	NA	0	2.318	1	NA	0	3.42182	NA	NA
testis	denovo_797	3L	10425532	10426237	Intergenic	676	2	1	2.566	1	NA	0	NA	0	NA	NA	NA
testis	denovo_447	3L	10436930	10437827	Intergenic	892	2	1	6.981	4	2.672	1	2.288	1	NA	NA	NA
testis	denovo_734	3L	10445014	10445696	Intergenic	617	1	2	1.212	1	NA	0	NA	0	NA	NA	NA
testis	denovo_433	3L	10493783	10494784	Intronic	1016	2	2	1.19	1	NA	0	NA	0	NA	NA	NA
testis	denovo_1151	3L	10562445	10564291	Intronic	1866	5	3	2.562	1	NA	0	NA	0	NA	NA	NA
AG	denovo_354	3L	10844446	10845868	Intronic	1380	3	2	1.015	1	NA	0	NA	0	NA	NA	NA
AG	denovo_1015	3L	11339397	11339706	Intergenic	309	1	1	1.162	1	NA	0	NA	0	NA	NA	NA
testis	denovo_713	3L	11860946	11866249	Intronic	1242	11	4	1.882	4	NA	0	NA	0	-1.83687	NA	NA
testis	denovo_543	3L	11872799	11873118	Intronic	480	3	1	2.074	1	NA	0	NA	0	NA	NA	NA
testis	denovo_1121	3L	11874287	11875919	Intronic	1448	5	2	7.106	2	NA	0	1.143	1	-5.43715	NA	NA
testis	denovo_389	3L	11912071	11912794	Intronic	724	1	1	3.422	1	NA	0	3.816	1	NA	2.39123	NA
testis	denovo_599	3L	12106960	12107795	Intergenic	828	2	1	1.166	1	NA	0	NA	0	NA	NA	NA
testis	denovo_464	3L	12254352	12255064	Intronic	705	1	1	2.105	1	NA	0	NA	0	NA	NA	NA
testis	denovo_940	3L	12455048	12456146	Intergenic	1099	1	1	1.786	1	NA	0	NA	0	NA	NA	NA
testis	denovo_870	3L	12720602	12730195	Intergenic	719	3	2	1.235	1	NA	0	NA	0	NA	NA	NA
testis	denovo_403	3L	12896641	12898587	Intergenic	1958	3	4	2.043	1	NA	0	NA	0	NA	NA	NA
testis	denovo_334	3L	12929874	12931020	Intergenic	1095	3	1	1.406	1	NA	0	NA	0	NA	NA	NA
testis	denovo_671	3L	13094212	13094715	Intergenic	469	3	1	1.492	2	2.347	1	NA	0	NA	NA	NA
testis	denovo_529	3L	13147456	13149009	Intergenic	449	2	1	6.58	4	NA	0	NA	0	-5.11713	NA	NA
testis	denovo_887	3L	13156211	13159583	Intergenic	1883	15	2	2.966	1	NA	0	NA	0	NA	NA	NA
AG	denovo_342	3L	13319444	13320641	Intergenic	1192	2	1	2.738	3	1.363	1	NA	0	NA	NA	NA
testis	denovo_342	3L	13319444	13320641	Intergenic	1192	2	1	1.581	2	NA	0	NA	0	NA	NA	NA
testis	denovo_897	3L	13621956	13622239	Intronic	302	1	1	3.382	3	3.056	1	7.759	1	NA	1.49592	NA
testis	denovo_834	3L	13695103	13695497	Intronic	394	1	1	NA	0	1.395	1	NA	0	NA	NA	NA
testis	denovo_595	3L	13776587	13776972	Intronic	390	1	1	1.914	2	1.368	1	NA	0	NA	NA	NA
testis	denovo_760	3L	14155481	14159445	Intergenic	1450	4	3	2.31	4	NA	0	2.394	1	-1.57347	NA	NA
testis	denovo_727	3L	14253320	14254071	Intergenic	512	1	2	1.038	1	NA	0	NA	0	NA	NA	NA
testis	denovo_499	3L	14280688	14281232	Intronic	545	1	1	1.514	1	NA	0	NA	0	NA	NA	NA
AG	denovo_534	3L	14604207	14605963	Intergenic	795	2	2	1.024	1	NA	0	NA	0	NA	NA	NA
testis	denovo_643	3L	15181198	15182693	Intergenic	995	3	1	1.231	2	NA	0	NA	0	NA	NA	NA
testis	denovo_140	3L	15321170	15321854	Intergenic	703	3	2	8.022	1	NA	0	NA	0	-4.93303	-5.27361	NA
testis	denovo_1114	3L	15360932	15361527	Intergenic	586	1	1	2.36	3	NA	0	NA	0	-4.84354	NA	NA
testis	denovo_878	3L	15451189	15451652	Intergenic	458	1	1	1.161	2	NA	0	NA	0	NA	NA	NA
AG	denovo_1226	3L	15477236	15479586	Intergenic	1033	9	4	2.869	4	2.448	1	NA	0	NA	-4.39934	-2.84024
testis	denovo_1226	3L	15477236	15479586	Intergenic	1033	9	4	1.306	2	NA	0	NA	0	NA	NA	NA
testis	denovo_999	3L	15783859	15784384	Intergenic	526	1	1	1.041	1	NA	0	NA	0	NA	NA	NA
testis	denovo_540	3L	16476044	16476865	Intronic	806	5	2	3.348	1	NA	0	NA	0	NA	NA	NA
testis	denovo_931	3L	16751802	16752780	Intergenic	979	1	1	9.703	1	NA	0	NA	0	-5.98413	-5.14201	NA
testis	denovo_1185	3L	17080677	17081040	Intronic	365	1	1	1.151	1	NA	0	NA	0	NA	NA	NA
AG	denovo_1099	3L	17154233	17160440	Intronic	3531	4	3	NA	0	1.249	1	1.45	1	1.31553	NA	NA
testis	denovo_1224	3L	17194543	17195813	Intronic	1270	4	1	5.033	2	1.782	1	NA	0	NA	NA	NA
testis	denovo_1210	3L	17569467	17570017	Intronic	552	4	2	20.601	3	NA	0	NA	0	NA	NA	NA
testis	denovo_906	3L	18062532	18063006	Intronic	463	2	1	1.417	1	NA	0	NA	0	NA	NA	NA
AG	denovo_1069	3L	18219024	18224152	Intergenic	5163	5	1	1.221	1	NA	0	NA	0	NA	NA	NA
testis	denovo_25	3L	18326043	18326737	Intergenic	497	2	2	1.021	1	NA	0	NA	0	NA	NA	NA
testis	denovo_64	3L	18520486	18521348	Intergenic	823	1	2	1.297	1	NA	0	NA	0	NA	NA	NA
testis	denovo_1302	3L	18546280	18547058	Intergenic	779	1	1	6.021	4	3.704	1	4.79	1	NA	NA	NA
testis	denovo_675	3L	18691572	18692329	Intergenic	831	4	2	1.546	1	NA	0	NA	0	NA	NA	NA
testis	denovo_1171	3L	18972096	18972881	Intergenic	791	1	1	4.357	1	1.484	1	2.014	1	NA	NA	NA
testis	denovo_685	3L	20092651	20096279	Intergenic	1818	7	4	1.601	1	NA	0	NA	0	NA	NA	NA
testis	denovo_96	3L	20560013	20560447	Intergenic	443	1	1	NA	0	2.121	1	NA	0	7.40832	NA	NA
testis	denovo_274	3L	20588949	20591690	Intergenic	2196	3	3	2.684	1	NA	0	NA	0	NA	NA	NA
testis	denovo_1098	3L	20677384	20677877	Intergenic	476	2	1	1.763	4	NA	0	NA	0	-4.86658	-4.80019	NA
testis	denovo_1216	3L	20907873	20908306	Intergenic	438	1	1	1.183	1	NA	0	NA	0	NA	NA	NA
testis	denovo_438	3L	21363463	21364036	Intergenic	574	1	1	1.306	2	NA	0	NA	0	NA	NA	NA
testis	denovo_260	3L	21602500	21602890	Intronic	392	1	1	1.427	3	1.078	1	1.682	1	NA	NA	NA
testis	denovo_1327	3L	22410786	22411778	Intergenic	993	4	1	1.699	1	NA	0	NA	0	NA	NA	NA
testis	denovo_998	3L	22431478	22432489	Intergenic	1012	1	1	7.76	1	NA	0	NA	0	-5.41061	-5.87444	NA
testis	denovo_1028	3L	24059406	24059778	Intergenic	373	1	1	1.356	4	NA	0	NA	0	NA	-3.33042	NA
testis	denovo_1021	3R	4215912	4216210	Intronic	338	1	1	1.77	1	NA	0	NA	0	NA	NA	NA
testis	denovo_1007	3R	4509600	4510049	Intronic	450	2	1	3.011	1	NA	0	NA	0	NA	NA	NA
AG	denovo_217	3R	4762436	4763278	Intronic	845	2	2	10.144	2	NA	0	NA	0	-6.07727	-6.11244	NA
testis	denovo_1308	3R	5214576	5215148	Intronic	584	2	2	1.158	1	NA	0	NA	0	NA	NA	NA
testis	denovo_375	3R	5718407	5722002	Intergenic	1408	3	4	1.187	1	NA	0	NA	0	NA	NA	NA
testis	denovo_1061	3R	5921787	5922830	Intronic	1043	2	1	1.224	2	NA	0	NA	0	NA	NA	NA
testis	denovo_505	3R	5985744	5986782	Intergenic	1060	1	3	2.042	4	NA	0	NA	0	-6.13953	-3.25612	NA
testis	denovo_1231	3R	6045893	6047535	Intergenic	1643	2	1	1.435	4	NA	0	NA	0	-3.88585	-3.05932	NA
testis	denovo_465	3R	6063960	6064807	Intergenic	773	5	2	NA	0	1.203	1	NA	0	NA	NA	NA
testis	denovo_690	3R	6226330	6226897	Intergenic	517	1	2	1.509	1	NA	0	NA	0	NA	NA	NA
testis	denovo_923	3R	6562555	6578395	Intronic	396	1	2	1.213	4	NA	0	1.32	1	NA	NA	NA
testis	denovo_95	3R	6612710	6613048	Intergenic	339	1	1	1.026	2	NA	0	NA	0	NA	NA	NA
testis	denovo_842	3R	6714511	6715535	Intronic	793	1	2	1.788	3	NA	0	NA	0	NA	-3.89671	NA
testis	denovo_982	3R	6731948	6733006	Intronic	921	9	5	1.395	1	NA	0	NA	0	NA	NA	NA
testis	denovo_231	3R	6899214	6899947	Intronic	736	1	1	NA	0	1.132	1	1.498	1	NA	NA	NA
testis	denovo_578	3R	6921591	6923722	Intronic	683	4	3	1.232	1	NA	0	NA	0	NA	NA	NA
testis	denovo_151	3R	6987179	6988535	Intronic	1363	1	1	1.324	1	NA	0	NA	0	NA	NA	NA
testis	denovo_1353	3R	7091545	7091818	Intergenic	353	1	1	1.398	1	NA	0	NA	0	NA	NA	NA
testis	denovo_256	3R	7459697	7460028	Intergenic	332	1	1	1.599	2	NA	0	NA	0	NA	NA	NA
testis	denovo_1091	3R	7479476	7479833	Intergenic	358	1	1	1.217	1	NA	0	NA	0	NA	NA	NA
testis	denovo_1071	3R	7585145	7586757	Intronic	650	3	2	2.728	2	NA	0	NA	0	-3.1428	-2.91682	NA
testis	denovo_476	3R	7942791	7943964	Intronic	1055	5	2	1.977	1	NA	0	NA	0	NA	NA	NA
AG	denovo_891	3R	8892725	8893156	Intronic	432	1	1	2.741	5	NA	0	NA	0	NA	-5.20716	NA
testis	denovo_1260	3R	8967504	8969010	Intergenic	1506	1	1	1.992	4	NA	0	NA	0	-2.50268	-3.87073	NA
testis	denovo_500	3R	9165616	9166092	Intronic	477	1	1	1.261	1	NA	0	NA	0	NA	NA	NA
testis	denovo_364	3R	9182652	9182951	Intronic	301	1	1	1.021	1	NA	0	NA	0	NA	NA	NA
testis	denovo_1025	3R	9203323	9203860	Intronic	530	4	2	2.712	1	NA	0	NA	0	NA	NA	NA
testis	denovo_408	3R	9318891	9319219	Intronic	346	1	1	NA	0	NA	0	1.127	1	NA	NA	NA
testis	denovo_916	3R	9836643	9837702	Intronic	1059	3	2	1.955	3	NA	0	NA	0	-2.13578	NA	NA
testis	denovo_554	3R	10416854	10417624	Intergenic	770	1	1	1.263	1	NA	0	1.141	1	NA	NA	NA
testis	denovo_385	3R	10448223	10449139	Intergenic	917	1	1	1.189	1	NA	0	NA	0	NA	NA	NA
testis	denovo_961	3R	10483907	10484581	Intergenic	594	3	2	1.289	1	NA	0	NA	0	NA	NA	NA
testis	denovo_972	3R	10573747	10574106	Intronic	362	1	1	1.302	4	NA	0	2.723	1	NA	NA	NA
testis	denovo_815	3R	10716916	10718802	Intergenic	1877	4	1	1.362	1	NA	0	NA	0	NA	NA	NA
testis	denovo_1156	3R	10730841	10732423	Intergenic	1593	3	3	14.656	1	NA	0	NA	0	-7.73158	-6.61128	NA
testis	denovo_1212	3R	10909350	10917483	Intergenic	3842	6	2	2.18	2	NA	0	NA	0	-1.40665	NA	NA
testis	denovo_848	3R	10956829	10964241	Intergenic	449	2	2	1.421	1	NA	0	NA	0	NA	NA	NA
testis	denovo_869	3R	10965083	10965515	Intergenic	459	2	1	1.421	1	NA	0	NA	0	NA	NA	NA
testis	denovo_38	3R	11188016	11189586	Intergenic	1571	6	2	4.408	1	NA	0	NA	0	-2.89197	-3.42455	NA
testis	denovo_810	3R	11267344	11268186	Intergenic	843	1	1	1.616	2	NA	0	NA	0	NA	NA	NA
testis	denovo_42	3R	11306282	11306973	Intergenic	691	3	1	1.442	1	NA	0	NA	0	NA	NA	NA
testis	denovo_901	3R	12132382	12133476	Intergenic	1095	2	2	3.145	3	NA	0	NA	0	-6.13832	-6.07347	NA
testis	denovo_1271	3R	12735424	12736002	Intergenic	579	1	1	1.416	2	NA	0	NA	0	NA	NA	NA
testis	denovo_527	3R	12774106	12774587	Intronic	482	1	1	1.129	1	NA	0	NA	0	NA	NA	NA
testis	denovo_1281	3R	12821898	12824699	Intergenic	586	3	2	1.971	1	NA	0	NA	0	NA	NA	NA
testis	denovo_524	3R	13082286	13083137	Intergenic	855	2	2	1.02	1	NA	0	NA	0	NA	NA	NA
testis	denovo_241	3R	13170595	13172276	Intergenic	1681	3	2	1.076	1	NA	0	NA	0	NA	NA	NA
testis	denovo_542	3R	13796869	13797305	Intergenic	437	1	1	1.272	1	NA	0	NA	0	NA	NA	NA
AG	denovo_612	3R	14231642	14232106	Intergenic	468	1	1	2.15	1	NA	0	NA	0	NA	NA	NA
testis	denovo_442	3R	14587211	14587866	Intronic	678	1	1	3.315	2	NA	0	NA	0	-1.79788	-4.73054	NA
testis	denovo_411	3R	14924318	14925114	Intergenic	697	1	2	1.1	1	NA	0	NA	0	NA	NA	NA
testis	denovo_188	3R	14937252	14937903	Intergenic	851	1	1	4.681	1	NA	0	NA	0	-4.27785	NA	NA
AG	denovo_863	3R	14964768	14965132	Intergenic	369	2	2	2.094	1	NA	0	NA	0	NA	NA	NA
testis	denovo_716	3R	14979050	14979666	Intergenic	591	1	2	1.137	1	NA	0	NA	0	NA	NA	NA
testis	denovo_791	3R	15020217	15021755	Intergenic	1106	3	2	2.049	1	NA	0	NA	0	NA	NA	NA
testis	denovo_559	3R	15155039	15155613	Intronic	505	1	2	1.984	4	1.061	1	NA	0	NA	-2.95428	NA
testis	denovo_1326	3R	15587655	15588765	Intergenic	1109	1	1	2.857	3	NA	0	1.004	1	-6.09615	NA	NA
testis	denovo_283	3R	15651605	15651921	Intergenic	317	1	1	1.035	1	NA	0	NA	0	NA	NA	NA
testis	denovo_162	3R	16525117	16526136	Intronic	1026	3	2	2.468	2	NA	0	NA	0	NA	NA	NA
testis	denovo_117	3R	17189376	17190108	Intronic	725	1	1	1.37	1	NA	0	NA	0	NA	NA	NA
AG	denovo_1096	3R	17273557	17274002	Intergenic	445	1	1	17.663	5	3.033	1	1.363	1	-2.81158	-3.32382	NA
AG	denovo_161	3R	17519615	17521203	Intergenic	1553	2	2	19.533	1	1.257	1	1.098	1	NA	-1.65272	NA
testis	denovo_763	3R	17844563	17846576	Intronic	1663	1	2	8.05	1	NA	0	NA	0	-6.78777	-3.11517	NA
testis	denovo_417	3R	18058228	18061251	Intergenic	361	1	2	2.715	1	NA	0	NA	0	NA	NA	NA
testis	denovo_132	3R	18106079	18106445	Intronic	385	3	1	2.543	4	NA	0	2.03	1	-1.85944	NA	NA
testis	denovo_94	3R	18139947	18141183	Intergenic	1248	3	2	1.222	1	NA	0	NA	0	NA	NA	NA
testis	denovo_971	3R	18154596	18155592	Intergenic	890	2	2	1.32	1	NA	0	NA	0	NA	NA	NA
testis	denovo_50	3R	18232394	18234487	Intergenic	1629	2	3	1.845	1	NA	0	NA	0	NA	NA	NA
testis	denovo_1089	3R	18260073	18260742	Intergenic	1152	12	2	8.582	5	NA	0	NA	0	-4.80451	-5.74836	NA
testis	denovo_114	3R	18507844	18509098	Intronic	509	3	3	1.062	1	NA	0	NA	0	NA	NA	NA
testis	denovo_195	3R	18823247	18824131	Intronic	878	2	2	2.921	1	NA	0	NA	0	NA	NA	NA
testis	denovo_388	3R	18837076	18838522	Intronic	588	3	2	NA	0	NA	0	1.011	1	NA	NA	NA
testis	denovo_607	3R	18892014	18893095	Intergenic	984	3	2	1.849	2	1.044	1	2.448	1	NA	NA	NA
testis	denovo_300	3R	19340154	19340514	Intergenic	336	1	2	1.535	2	1.336	1	1.043	1	NA	NA	NA
testis	denovo_502	3R	19362554	19363746	Intergenic	1125	3	2	2.701	1	2.482	1	2.639	1	2.45892	2.46329	NA
testis	denovo_1257	3R	19372178	19372477	Intronic	301	1	1	1.072	1	NA	0	1.221	1	NA	NA	NA
testis	denovo_624	3R	19432668	19434033	Intronic	1346	3	1	1.693	2	NA	0	NA	0	NA	NA	NA
testis	denovo_1200	3R	19981410	19982209	Intronic	670	4	2	1.713	2	NA	0	NA	0	NA	NA	NA
testis	denovo_318	3R	20191691	20192488	Intergenic	798	2	3	1.233	1	NA	0	NA	0	NA	NA	NA
testis	denovo_629	3R	20488017	20489078	Intergenic	1064	1	1	1.516	1	NA	0	NA	0	NA	NA	NA
testis	denovo_638	3R	20718370	20718883	Intergenic	515	1	1	1.02	1	NA	0	NA	0	NA	NA	NA
testis	denovo_1307	3R	21256670	21257622	Intronic	953	1	1	2.404	1	NA	0	NA	0	NA	NA	NA
AG	denovo_486	3R	21726158	21728085	Intergenic	1023	4	1	10.65	6	1.042	1	NA	0	NA	-3.96493	NA
AG	denovo_244	3R	21856948	21857826	Intergenic	871	1	1	1.32	1	NA	0	NA	0	NA	NA	NA
testis	denovo_1162	3R	22092238	22098183	Intergenic	795	4	2	14.669	1	1.864	1	5.197	1	NA	NA	NA
testis	denovo_806	3R	22182572	22183023	Intronic	452	1	1	5.171	1	NA	0	NA	0	-3.47201	NA	NA
testis	denovo_100	3R	22501502	22502691	Intronic	1135	3	3	1.493	1	NA	0	NA	0	NA	NA	NA
testis	denovo_1182	3R	22597094	22597936	Intronic	801	3	1	2.126	1	NA	0	NA	0	NA	NA	NA
testis	denovo_1283	3R	22858828	22859477	Intergenic	1315	2	3	4.213	2	NA	0	1.033	1	-4.99743	NA	NA
testis	denovo_1256	3R	22860224	22861175	Intergenic	999	2	1	3.844	3	NA	0	NA	0	-6.52687	-6.46272	NA
testis	denovo_964	3R	22870277	22871568	Intergenic	1292	1	1	1.137	1	NA	0	NA	0	NA	NA	NA
testis	denovo_120	3R	22876441	22877584	Intergenic	1059	1	2	1.066	1	NA	0	NA	0	NA	NA	NA
testis	denovo_1013	3R	22878941	22879424	Intergenic	487	1	1	NA	0	1.05	1	NA	0	NA	NA	NA
testis	denovo_680	3R	22903015	22903934	Intronic	924	1	1	3.53	1	3.375	1	NA	0	1.92347	NA	NA
testis	denovo_1248	3R	23330173	23331243	Intronic	1075	2	1	1.34	1	NA	0	NA	0	NA	NA	NA
AG	denovo_1274	3R	23478002	23478483	Intergenic	491	1	1	NA	0	NA	0	1.77	1	NA	3.79013	NA
testis	denovo_1	3R	23510082	23510779	Intergenic	705	1	1	1.324	2	NA	0	NA	0	NA	NA	NA
testis	denovo_277	3R	23551375	23552470	Intergenic	1106	4	1	2.337	4	NA	0	1.517	1	-1.84536	NA	NA
testis	denovo_557	3R	23654918	23655337	Intronic	364	1	2	1.17	1	NA	0	NA	0	NA	NA	NA
testis	denovo_425	3R	23878324	23880083	Intronic	444	2	3	1.212	3	NA	0	NA	0	NA	NA	NA
AG	denovo_1050	3R	25529679	25530303	Intronic	625	2	2	2.511	1	2.349	1	NA	0	2.63702	NA	-3.02683
testis	denovo_1050	3R	25529679	25530303	Intronic	625	2	2	2.579	5	1.894	1	6.254	1	NA	NA	NA
testis	denovo_802	3R	25566196	25566649	Intronic	471	1	1	NA	0	1.316	1	NA	0	6.85461	NA	NA
AG	denovo_633	3R	25643352	25644098	Intronic	748	1	1	1.067	1	NA	0	NA	0	NA	NA	NA
testis	denovo_399	3R	26072336	26072779	Intergenic	468	2	1	1.891	1	NA	0	NA	0	NA	NA	NA
testis	denovo_313	3R	26146319	26146668	Intergenic	350	1	1	8.371	4	1.971	1	4.519	1	-2.27139	NA	NA
AG	denovo_890	3R	26179849	26180949	Intronic	1080	2	1	3.764	5	NA	0	1.652	1	-3.07128	-1.13412	NA
testis	denovo_893	3R	27323956	27326293	Intergenic	508	2	2	4.903	3	1.196	1	NA	0	-2.28127	-4.77451	NA
testis	denovo_66	3R	27432059	27432615	Intronic	909	1	1	1.68	1	NA	0	NA	0	NA	NA	NA
testis	denovo_192	3R	27759827	27760193	Intergenic	366	1	1	1.193	1	NA	0	1.033	1	NA	NA	NA
testis	denovo_1003	3R	27869379	27870178	Intronic	802	1	1	1.84	2	NA	0	NA	0	NA	NA	NA
testis	denovo_149	3R	28002501	28002937	Intergenic	437	1	1	1.118	1	NA	0	NA	0	NA	NA	NA
testis	denovo_658	3R	28008048	28008507	Intergenic	468	1	1	1.161	2	NA	0	NA	0	NA	NA	NA
AG	denovo_212	3R	28054751	28056790	Intronic	1325	3	1	2.543	2	7.659	1	NA	0	3.30888	NA	-3.38833
testis	denovo_889	3R	28057188	28058370	Intronic	1026	3	3	NA	0	2.254	1	NA	0	NA	NA	NA
testis	denovo_1066	3R	28103806	28111543	Intergenic	322	1	2	1.08	1	NA	0	NA	0	NA	NA	NA
testis	denovo_493	3R	28135488	28136172	Intergenic	807	3	1	1.795	1	NA	0	NA	0	NA	NA	NA
testis	denovo_365	3R	28183902	28184451	Intronic	550	1	1	1.181	1	NA	0	NA	0	NA	NA	NA
testis	denovo_772	3R	29184130	29185076	Intronic	933	2	1	1.196	1	NA	0	NA	0	NA	NA	NA
testis	denovo_1298	3R	29273033	29273734	Intergenic	639	4	2	1.138	1	NA	0	NA	0	NA	NA	NA
testis	denovo_757	3R	29304986	29306584	Intergenic	1593	1	1	3.128	1	NA	0	NA	0	NA	NA	NA
testis	denovo_193	3R	29365514	29366612	Intergenic	1109	1	1	3.484	2	NA	0	NA	0	-5.74895	-5.15632	NA
testis	denovo_836	3R	29412005	29413281	Intronic	1286	2	1	2.256	1	NA	0	NA	0	NA	NA	NA
testis	denovo_181	3R	29440119	29440684	Intronic	566	1	1	1.611	1	NA	0	NA	0	NA	NA	NA
testis	denovo_746	3R	29625189	29627056	Intergenic	1908	3	2	4.646	2	1.223	1	NA	0	NA	-5.52785	NA
testis	denovo_458	3R	30276389	30277324	Intergenic	857	4	2	1.734	1	NA	0	NA	0	NA	NA	NA
testis	denovo_516	3R	30668164	30668966	Intergenic	791	2	2	1.316	1	NA	0	NA	0	NA	NA	NA
testis	denovo_369	3R	30834821	30835602	Intronic	795	1	1	1.189	1	NA	0	NA	0	NA	NA	NA
testis	denovo_681	3R	30937821	30938348	Intergenic	546	3	1	1.656	5	NA	0	NA	0	-2.55801	-4.60002	NA
testis	denovo_636	3R	30948972	30950512	Intergenic	1540	1	1	1.152	1	NA	0	NA	0	NA	NA	NA
testis	denovo_1049	3R	30973185	30974116	Intronic	932	1	1	10.6	1	NA	0	NA	0	NA	NA	NA
testis	denovo_1230	3R	30974876	30975742	Intronic	851	2	2	1.09	1	NA	0	NA	0	NA	NA	NA
AG	denovo_1297	3R	31116833	31117193	Intergenic	361	1	1	1.045	1	NA	0	NA	0	NA	NA	NA
testis	denovo_1234	3R	31909418	31911433	Intronic	633	2	1	NA	0	1.254	1	NA	0	3.13736	NA	NA
testis	denovo_736	X	836630	837672	Intronic	1041	2	2	7.153	1	NA	0	NA	0	-5.84424	-5.77721	NA
AG	denovo_951	X	953327	953934	Intergenic	608	1	1	3.661	6	3.729	1	4.426	1	NA	NA	NA
testis	denovo_977	X	1003242	1003805	Intergenic	568	1	1	1.38	1	NA	0	NA	0	NA	NA	NA
testis	denovo_1130	X	1008026	1009898	Intergenic	1874	3	1	2.825	2	2.187	1	1.777	1	NA	NA	NA
AG	denovo_577	X	1277110	1277530	Intergenic	421	1	1	4.223	3	NA	0	NA	0	-5.65372	-6.179	NA
testis	denovo_1317	X	1339913	1340298	Intronic	387	2	1	NA	0	NA	0	1.228	1	NA	NA	NA
testis	denovo_573	X	2542308	2543834	Intronic	766	3	2	1.766	2	NA	0	NA	0	NA	NA	NA
AG	denovo_460	X	2767254	2768710	Intronic	1311	4	2	2.415	1	NA	0	NA	0	NA	NA	NA
testis	denovo_320	X	2812376	2812781	Intronic	406	1	1	NA	0	NA	0	1.303	1	NA	NA	NA
testis	denovo_1270	X	4052160	4052555	Intergenic	396	1	1	NA	0	1.272	1	NA	0	NA	NA	NA
testis	denovo_712	X	4169914	4170247	Intronic	335	1	1	2.197	1	NA	0	NA	0	NA	NA	NA
testis	denovo_576	X	4234383	4234681	Intergenic	335	1	1	NA	0	NA	0	4.052	1	NA	NA	NA
testis	denovo_566	X	4767774	4768187	Intergenic	414	1	1	1.35	1	NA	0	NA	0	NA	NA	NA
AG	denovo_1363	X	5497599	5498279	Intergenic	681	1	1	1.771	1	NA	0	NA	0	NA	NA	NA
AG	denovo_314	X	5499125	5499598	Intergenic	483	3	2	1.962	1	NA	0	NA	0	NA	NA	NA
testis	denovo_314	X	5499125	5499598	Intergenic	483	3	2	10.861	2	NA	0	NA	0	-5.93831	-5.8755	NA
testis	denovo_853	X	5822927	5824264	Intronic	1240	2	3	2.322	1	NA	0	NA	0	NA	NA	NA
testis	denovo_1107	X	6503601	6504232	Intronic	633	1	1	1.952	1	NA	0	NA	0	NA	NA	NA
testis	denovo_187	X	7214659	7215183	Intronic	698	3	2	1.246	1	NA	0	NA	0	NA	NA	NA
testis	denovo_41	X	7271768	7272464	Intronic	698	4	2	5.614	4	NA	0	NA	0	-2.9451	-4.16889	NA
testis	denovo_386	X	7497731	7498432	Intergenic	730	3	2	5.586	1	NA	0	NA	0	-3.54045	NA	NA
testis	denovo_218	X	7569851	7570496	Intergenic	586	3	2	1.031	1	NA	0	NA	0	NA	NA	NA
testis	denovo_1261	X	7754903	7755361	Intergenic	459	1	1	1.798	1	1.348	1	NA	0	NA	NA	NA
AG	denovo_950	X	7824833	7825400	Intergenic	568	1	1	1.823	1	NA	0	NA	0	NA	NA	NA
testis	denovo_831	X	8288466	8288945	Intronic	509	3	1	1.263	1	1.219	1	NA	0	NA	NA	NA
testis	denovo_214	X	8606810	8607326	Intergenic	519	2	1	2.227	2	NA	0	NA	0	NA	NA	NA
testis	denovo_987	X	8741926	8742511	Intergenic	589	1	1	1.03	1	NA	0	NA	0	NA	NA	NA
testis	denovo_673	X	9386885	9389902	Intronic	812	8	3	2.149	1	NA	0	NA	0	NA	NA	NA
testis	denovo_1174	X	10200844	10201235	Intronic	394	3	1	1.51	1	NA	0	NA	0	NA	NA	NA
testis	denovo_927	X	10202743	10203151	Intronic	409	3	1	3.085	4	NA	0	NA	0	-4.24412	-5.23308	NA
AG	denovo_544	X	10443022	10443368	Intronic	342	2	1	12.619	1	1.377	1	1.433	1	NA	NA	NA
testis	denovo_329	X	10986286	10986646	Intronic	361	3	1	NA	0	1.107	1	1.132	1	NA	NA	NA
testis	denovo_373	X	11001757	11003171	Intronic	724	3	2	1.648	1	NA	0	NA	0	NA	NA	NA
testis	denovo_191	X	11205296	11206573	Intergenic	1274	3	2	3.791	1	NA	0	NA	0	NA	NA	NA
testis	denovo_308	X	12093941	12094561	Intronic	605	2	1	1.211	2	NA	0	NA	0	NA	NA	NA
testis	denovo_646	X	12378608	12379062	Intergenic	458	1	1	NA	0	1.613	1	NA	0	3.93987	NA	NA
testis	denovo_751	X	12386358	12387198	Intergenic	647	2	3	1.582	1	NA	0	NA	0	NA	NA	NA
testis	denovo_564	X	12827154	12828053	Intronic	899	1	1	2.389	1	NA	0	NA	0	NA	NA	NA
testis	denovo_331	X	12881930	12883021	Intronic	1116	1	1	1.341	2	NA	0	NA	0	NA	NA	NA
testis	denovo_582	X	12996796	12997985	Intronic	1226	4	1	2.18	2	NA	0	NA	0	NA	NA	NA
testis	denovo_1161	X	13480768	13482402	Intronic	1582	2	2	6.479	1	NA	0	NA	0	-3.75834	-3.90944	NA
testis	denovo_1024	X	14410524	14410845	Intronic	362	2	2	NA	0	NA	0	1.687	1	NA	NA	NA
testis	denovo_1103	X	14423042	14424028	Intronic	954	2	1	2.617	1	NA	0	NA	0	NA	NA	NA
testis	denovo_1145	X	14498549	14498785	Intergenic	1271	2	1	8.996	1	NA	0	NA	0	NA	NA	NA
testis	denovo_888	X	14510594	14511436	Intergenic	864	7	2	1.731	1	NA	0	NA	0	NA	NA	NA
testis	denovo_1148	X	14671403	14672073	Intergenic	677	1	1	1.426	1	NA	0	NA	0	NA	NA	NA
testis	denovo_1079	X	14958452	14963779	Intronic	1360	3	3	3.044	1	NA	0	NA	0	NA	NA	NA
testis	denovo_45	X	15171217	15171864	Intergenic	646	1	1	1.866	1	NA	0	NA	0	NA	NA	NA
testis	denovo_27	X	16149856	16150288	Intergenic	426	2	2	1.088	1	NA	0	NA	0	NA	NA	NA
testis	denovo_1125	X	16171523	16172445	Intergenic	895	3	1	16.181	1	NA	0	NA	0	-6.03281	-6.49638	NA
testis	denovo_268	X	17000938	17002026	Intronic	1091	2	2	4.286	1	NA	0	NA	0	NA	NA	NA
AG	denovo_39	X	17412191	17412530	Intergenic	342	1	1	1.071	1	NA	0	NA	0	NA	NA	NA
AG	denovo_514	X	18018939	18019343	Intronic	404	2	1	1.263	1	NA	0	NA	0	NA	NA	NA
testis	denovo_714	X	18223159	18224315	Intronic	1142	2	1	3.006	1	NA	0	NA	0	NA	NA	NA
AG	denovo_169	X	18597407	18599092	Intergenic	1691	1	1	6.116	2	NA	0	NA	0	-1.08994	-5.96786	NA
AG	denovo_374	X	18599926	18600634	Intergenic	709	1	1	16.689	5	2.147	1	NA	0	-2.33602	-5.52995	-2.62148
AG	denovo_574	X	18604135	18604524	Intergenic	407	1	1	18.634	5	NA	0	NA	0	-4.78741	-7.79102	NA
testis	denovo_1330	X	18702604	18703483	Intergenic	710	1	2	7.413	1	NA	0	NA	0	-5.2478	-4.40672	NA
testis	denovo_139	X	18762584	18763633	Intergenic	595	2	1	1.195	2	NA	0	NA	0	NA	NA	NA
testis	denovo_343	X	18971208	18973034	Intronic	934	5	3	1.748	2	NA	0	NA	0	NA	NA	NA
AG	denovo_1355	X	19970417	19971170	Intergenic	829	1	2	1.139	1	NA	0	NA	0	NA	NA	NA
AG	denovo_461	X	19972484	19972919	Intergenic	444	1	1	1.92	1	NA	0	NA	0	NA	NA	NA
testis	denovo_1299	X	20059373	20060137	Intronic	773	1	1	2.107	1	NA	0	NA	0	NA	NA	NA
testis	denovo_459	X	20714031	20714769	Intergenic	678	1	2	11.568	1	NA	0	NA	0	-5.88263	-5.81834	NA
testis	denovo_1031	X	20717002	20718105	Intergenic	1048	1	2	3.749	1	NA	0	NA	0	NA	NA	NA
testis	denovo_1164	X	20899663	20900005	Intronic	340	1	1	1.057	1	NA	0	NA	0	NA	NA	NA
testis	denovo_279	X	20914550	20915208	Intronic	658	2	1	3.291	1	1.819	1	1.011	1	1.67575	NA	NA
testis	denovo_699	X	21254602	21255808	Intronic	736	1	3	1.369	1	NA	0	NA	0	NA	NA	NA
AG	denovo_844	X	21486227	21486838	Intergenic	598	1	1	1.164	1	NA	0	NA	0	NA	NA	NA
testis	denovo_583	X	22805102	22805988	Intergenic	892	2	1	3.22	1	NA	0	NA	0	NA	NA	NA
testis	denovo_912	X	22890878	22891488	Intergenic	555	1	2	2.98	1	NA	0	NA	0	NA	NA	NA

## Sheet: Table S5
Table S5: Candidates Frequencies
Population	Tissue	Region	N = 1	N = 2	N = 3	N = 4	N = 5	N = 6
Zambia	AG	Intronic	12	3	4	1	4	0
Zambia	AG	Intergenic	23	2	3	2	4	2
Zambia	Testis	Intronic	90	38	15	14	4	2
Zambia	Testis	Intergenic	139	41	20	16	6	2

## Sheet: Table S6
Table S6: Candidate de novo Genes At Different Cutoffs
Tissue	Cutoff	Type	ALL	Zambia Expressed	Mean # Zambia Lines	t.test vs mean # Zambia Expressed TPM ≥ 1
AG	TPM ≥ 1	Intergenic	37	36	2.11	NA
AG	TPM ≥ 1	Intronic	24	23	2.217	NA
AG	TPM ≥ 2	Intergenic	18	18	3.111	0.06936
AG	TPM ≥ 2	Intronic	14	14	2.929	0.2042
AG	TPM ≥ 5	Intergenic	8	8	4.25	0.01298
AG	TPM ≥ 5	Intronic	5	5	2.6	0.6293
Testis	TPM ≥ 1	Intergenic	243	224	1.73	NA
Testis	TPM ≥ 1	Intronic	178	163	1.83	NA
Testis	TPM ≥ 2	Intergenic	110	106	2.217	0.001798
Testis	TPM ≥ 2	Intronic	97	94	2.18	0.03886
Testis	TPM ≥ 5	Intergenic	45	44	2.432	0.007667
Testis	TPM ≥ 5	Intronic	31	31	2.84	0.001731
We explored how changing the TPM cutoff to retain a candidate would influence the number of candidates we accepted. As expected, many candidates were screened out when the TPM cutoff was increased, consistent with the general low expression level of de novo gene candidates. Increasing the TPM cutoff also removed most of the candidates identified in North America only, which is expected given that…

## Sheet: Table S7
Table S7: Single vs. Multi Exon de novo Candidates
Tissue	Type	Category	Number of Candidates	Percent Single Exon
AG	Intronic	Single Exon	16	66%%
AG	Intronic	Multiple Exons	8
AG	Intergenic	Single Exon	27	0.73
AG	Intergenic	Multiple Exons	10
Testis	Intronic	Single Exon	106	0.6
Testis	Intronic	Multiple Exons	72
Testis	Intergenic	Single Exon	141	0.58
Testis	Intergenic	Multiple Exons	102

## Sheet: Table S8
Table S8: Single vs. Multi-Transcript de novo Candidates
Tissue	Type	Category	Number of Candidates	Percent Single Transcript
AG	Intronic	Single Transcript	11	0.458333
AG	Intronic	Multiple Transcripts	13
AG	Intergenic	Single Transcript	24	0.648649
AG	Intergenic	Multiple Transcripts	13
Testis	Intronic	Single Transcript	75	0.421348
Testis	Intronic	Multiple Transcripts	103
Testis	Intergenic	Single Transcript	124	0.510288
Testis	Intergenic	Multiple Transcripts	119

## Sheet: Table S9
Table S9: Singleton vs. non-Singleton Gene Features
Tissue	Type	Category	Number of Candidates	Mean Maximum Transcript Length	T-test p-value	Mean Max # of Exons	T-test p-value	Mean TPM of expressed Zambia Lines	T-test: p-value
AG	Intronic	Singleton	12	753	0.604	1.33	0.77	2.64	0.68
AG	Intronic	Non-Singleton	11	670		1.27		3.14
AG	Intergenic	Singleton	23	814	0.86	1.39	0.982	2.53	0.0386
AG	Intergenic	Non-Singleton	13	773		1.39		6.99
Testis	Intronic	Singleton	90	790	0.97	1.52	0.65	2.29	0.0089
Testis	Intronic	Non-Singleton	73	792		1.58		3.5
Testis	Intergenic	Singleton	139	859	0.32	1.63	0.0398	3.3	0.961
Testis	Intergenic	Non-Singleton	85	934		1.42		3.28

## Sheet: Table S10
Table S10: Distribution of Singleton vs. Non-Singleton de novo Candidates in Zambia
Tissue	Category	Singleton	Non-Singleton	% Singleton	Fisher's Exact Test
AG	Autosomes	25	18	0.568	0.76
	X	10	5	0.667
Testis	Autosomes	191	147	0.565	0.005
	X	38	11	0.776

[truncated: 9 more sheets: Table S11, Table S12, Table S13, Table S14, Table S15, Table S16, Table S17, Table S18, Table S19]
